Title: Types and timing of trauma exposure across the life course and maternal hypertension

Authors:

Kaitlyn K Stanhope, PhD MPH, [Kaitlyn.keirseystanhope@emory.edu](mailto:Kaitlyn.keirseystanhope@emory.edu)<sup>a</sup>

Vasiliki Michopoulos, PhD, [vmichop@emory.edu](mailto:vmichop@emory.edu)<sup>b,a</sup>

Abigail Powers, PhD ABPP, [abigail.lott@emoryhealthcare.org](mailto:abigail.lott@emoryhealthcare.org)<sup>b</sup>

Sheree L Boulet, DrPH MPH, [sheree.lynn.boulet@emory.edu](mailto:sheree.lynn.boulet@emory.edu)<sup>a</sup>

Michael R Kramer, PhD, [mkr02@emory.edu](mailto:mkr02@emory.edu)<sup>c</sup>

Shakira F Suglia, ScD, [shakira.suglia@emory.edu](mailto:shakira.suglia@emory.edu)<sup>c</sup>

Affiliations

<sup>a</sup> Atlanta, Georgia, Emory University School of Medicine, Department of Gynecology and Obstetrics

<sup>b</sup> Atlanta, Georgia, Emory University School of Medicine, Department of Psychiatry and Behavioral Sciences

<sup>c</sup> Atlanta, Georgia, Rollins School of Public Health, Department of Epidemiology

Word count:

Corresponding author:

Kaitlyn K Stanhope, [Kaitlyn.keirseystanhope@emory.edu](mailto:Kaitlyn.keirseystanhope@emory.edu)

49 Jesse Hill Jr Drive, Office 353, Atlanta, Georgia 30303

Word count: 5390

## **Abstract**

**Objective:** To estimate associations between types and timing (first occurrence and time since) of trauma exposure and hypertension experienced during pregnancy in a safety-net hospital in Atlanta, Georgia.

**Methods:** Participants completed a 14-item trauma screener. We linked that information to data from the medical record on hypertension (inclusive of chronic hypertension, gestational hypertension, or preeclampsia). We fit logistic regression models and used the estimates to calculate risk ratios for each trauma type and each critical window (0-9 years, 10-19, and 20+). We fit unadjusted models and adjusted for age, parity, and education.

**Results:** We included 704 individuals with a delivery within 12 months of screening. The majority (94%, 661) reported at least one traumatic event, most commonly witnessing violence (79.4%). Overall, 18% experienced gestational hypertension, 10.8% chronic hypertension, and 11.9% preeclampsia. Among individuals who reported trauma, 31.5% screened positive for probable posttraumatic stress disorder and 30.9% for probable depression compared to 0 and 2.3% among those without reported trauma. No trauma type (violence, witnessing violence, non-interpersonal, or sexual assault) was associated with increased hypertensive risk, regardless of timing. Similarly, time between trauma and delivery (0-3 years, 3-10 years, 10+ years) was not associated with increased hypertensive risk.

**Conclusions:** In this sample with a high trauma and hypertension burden, trauma was not associated with elevated risk of hypertension during pregnancy, despite a high burden of PTSD and depressive symptoms among people with trauma exposure. Future research should consider how community-level exposure may modify the impact of trauma on adverse pregnancy outcomes.

Exposure to trauma across the life course is linked to poor cardiovascular health including atherosclerotic cardiovascular disease, hypertension, and diabetes.<sup>1</sup> Trauma exposure results in acute and long term physiologic changes, including shifts in vascular and neuroendocrine function.<sup>2-4</sup> People living in poverty and of minoritized racial, ethnic, and gender identities experience disproportionately high rates of stress and trauma compared to white and high income people.<sup>5-9</sup> While considerable evidence supports a relationship between trauma and cardiovascular disease in mid and late life, the relationship between trauma and poor cardiovascular health during other life stages, including pregnancy, remains unclear.

Increasingly, public health practitioners and clinicians are interested in the relationship between trauma exposure and cardiovascular risk during pregnancy. Pregnancy complications have been framed as a “window” to future cardiovascular disease.<sup>10,11</sup> The physiologic response to pregnancy, including whether or not the pregnant person develops a hypertensive disorder of pregnancy or gestational diabetes, is thought to mirror physiologic responses to aging.<sup>12</sup> Supporting this framework is the consistent evidence that people who experience hypertensive disorders of pregnancy are at increased risk of hypertension and experience an earlier onset of hypertension, compared to parous counterparts with uncomplicated pregnancies.<sup>10,13</sup> Trauma exposure may result in poor cardiovascular health through changing behaviors, physiological shifts, epigenetic ageing, or the development of psychiatric symptoms.<sup>1,14,15</sup> Understanding if and how trauma is related to hypertension during pregnancy may inform secondary prevention efforts for cardiovascular disease in people who have experienced trauma and our understanding of the mechanisms through which trauma increases cardiovascular risk.

To date, studies of trauma and hypertension during pregnancy have focused on trauma experienced during childhood, with mixed results. In a single-center study in the United States, Jasthi et al. (2023) identified a two-fold excess risk of hypertensive disorders of pregnancy among individuals who reported four or more adverse childhood experiences (ACEs) and screened positive for depression or anxiety during pregnancy compared to those with mental health symptoms but no ACEs.<sup>16</sup> In a study among the Hispanic

Community Health Study/Study of Latinos, the authors did not observe any association between accumulation of ACEs, and HDP or GDM.<sup>17</sup> Neither of these studies accounted for trauma exposure occurring during adulthood, which may mediate part of the association between childhood trauma and maternal risk.

The Weathering Hypothesis posits that the accumulation of stress exposure results in elevated risk of poor pregnancy outcomes.<sup>18,19</sup> Many authors have operationalized this as a count of events, regardless of when they happened in time. Friedman et al. compared model fit using a timing-based model and count-based definition of trauma and found that the type and number of traumatic events experienced in childhood was the strongest predictor of women's heart disease risk.<sup>20</sup> Alternately, individuals who experience trauma during adulthood, more proximate to conception, may experience acute psychiatric and physical consequences, possibly impacting pregnancy outcomes.<sup>9</sup>

In the current study, we focus on the potential association between characteristics of trauma exposure (type and timing) and hypertensive disorders of pregnancy in people seeking care at a safety-net hospital in Atlanta, Georgia. We hypothesize that more severe trauma exposure (e.g., directly experiencing violence or sexual assault) experienced in childhood will have the strongest association with hypertensive disorders of pregnancy, followed by the most recent trauma exposure.

## **Methods**

### *Study Setting and Population*

We used data from The Grady Trauma Project (GTP), conducted in Grady Memorial Hospital in Atlanta, Georgia. The GTP includes multiple substudies, two of which are included in this sample. The first is a long-running cross-sectional survey which recruited individuals in the waiting room of primary care, diabetes, and the Women's clinic from 2012-2020. The second recruited individuals during pregnancy and followed them through three months postpartum from 2017-2022. For both, we linked information from the survey to the electronic medical record creating a cohort. For the cross-sectional GTP sample, we

included deliveries to participants within twelve months following their survey. For the prospective GTP sample, we identified the index delivery linked to the pregnancy for which individuals were recruited (Supplemental Figure 1). Notably, the birthing population served by Grady faces a high burden of both medical comorbidities and ongoing social risks during their pregnancy compared to national averages.<sup>21,22</sup> This study was approved by the Emory Institutional Review board (STUDY00001471). All participants consented to participation in the Grady Trauma Project.

### *Measures*

Participants reported trauma on the “Traumatic Events Inventory”, a 14-item scale which asks about the occurrence of traumatic events and the first age at which they occurred. The TEI includes the following domains: experiencing natural disaster, a serious accident or injury, a sudden, life-threatening illness, military combat, witnessed the murder of a close friend/family, experiencing attack with or without a weapon by an intimate partner or other person, witnessing a friend/family member being attacked with or without a weapon, witnessing violence between caregivers (in childhood), physical maltreatment in childhood, emotional maltreatment in childhood, sexual abuse in childhood, adolescence, or adulthood, and other trauma (open-ended).<sup>23,24</sup> We classified traumatic events into four types: directly experienced violence, witnessed violence, sexual assault/abuse, and non-interpersonal trauma exposure. We also grouped events based on the age at which they first occurred: ages 0-9, 10-19, and 20+. For each event, we calculated a measure of “recency” or years between trauma and delivery. Participants who reported one or more traumatic events completed screening tools on post-traumatic stress disorder (PTSD) either modified PTSD Symptom Scale (mPSS)<sup>25</sup> or Posttraumatic Stress Disorder Checklist for Diagnostic and Statistical Manual of Mental Disorders -5 (PCL-5).<sup>25,26</sup> We used cut-offs to create binary measure of probable PTSD using guidance from the DSM IV-TR and 5, indicating symptoms from each cluster (three for DSM-IV and five for DSV-V).<sup>25</sup>

We used ICD-9 and ICD-10 codes as coded at the delivery hospitalization to identify hypertensive disorders including chronic hypertension, gestational hypertension, preeclampsia, or eclampsia at

delivery. Evidence suggests that ICD codes accurately identify hypertensive disorders with positive predictive values between 85-90%.<sup>27,28</sup> For the primary analysis, we collapsed all diagnoses into a single binary indicator of any maternal hypertension. We included the following covariates: maternal age at delivery, maternal education, and parity. Participants self-reported education in the survey.

### *Analysis*

We compared maternal characteristics by report of any traumatic event. We then fit multivariable logistic regression models to estimate the association between any traumatic event and trauma events in each category (directly experienced violence, witnessed violence, sexual assault/abuse, and non-interpersonal) separately. For models with trauma experienced at age 20+ as the exposure, we excluded birthing people less than 20. We used the “probratio” function in the R package “epitools” to transform beta estimates to risk ratios using maximum likelihood estimation.<sup>29</sup> We conducted a complete case analysis, restricting to observations with complete data on the exposure, outcome, and included covariates. We fit unadjusted models and models adjusting for age at delivery (<20, 20-34, 35+), parity (primiparous or multiparous), and education (less than high school or high school graduate). We consider education as an incomplete measure of socioeconomic status. We also fit models estimating the association between trauma recency (time between first exposure to that type of trauma and delivery age) in each category.

We conducted two main sensitivity analyses. First, to account for differences in individuals who participated in the Grady Trauma Project and BUMPP studies and the overall Grady population, we fit inverse probability of participation rates.<sup>30</sup> We considered age, parity, insurance, race/ethnicity, gravidity, chronic diabetes, and history of a mental illness diagnosis (ICD 9/10 code for alcohol or drug use disorder, mood disorder, PTSD, or anxiety) as important factors to use. We modeled the probability of participation using logistic regression and created stabilized weights. We repeated the primary models incorporating these weights. Second, we explored whether the overall observed associations differed by specific hypertensive diagnosis.

## Results

We included 704 people in the current sample (Table 1; Supplemental Figure 1). The majority of observations were dropped due to non-linkage with a delivery hospitalization (443 excluded), a delivery prior to completing the GTP survey (35 excluded), or a delivery more than 12 months following GTP (55 excluded). We further excluded 58 individuals missing the traumatic events inventory. Of those, the majority (94%, 661) reported at least one lifetime traumatic event. The majority of the study population graduated from high school (78.3%), reported no romantic partner (83.1%), and had Medicaid-insurance at delivery (94.2%). Just under a third of participants screened positive for probable PTSD (29.5%) and a similar proportion for depression (29.1%). Hypertensive disorders were common; over 40% of individuals had a diagnosis of one or more hypertensive disorders at delivery, most commonly gestational hypertension (18%) followed by chronic hypertension (10.8%).

The most common type of trauma experienced was witnessing violence (79.4%), followed by non-interpersonal (66.6%), experiencing violence (60.2%), and sexual assault/abuse (38.9%) (Table 2). Participants reported experiencing trauma at young ages. On average, the mean age at first experience of sexual assault/abuse was 10.6 (SD: 5.3), witnessing violence 11.6 (SD: 6.2), experiencing violence 13.2 (SD: 6.7), and non-interpersonal trauma 14.3 (SD: 7.8).

No type of trauma was associated with elevated risk of hypertension during pregnancy (Table 3) in either unadjusted models or after adjusting for parity, age, and education. Similarly, trauma recency was not associated with elevated risk of hypertension (Table 4). These results were maintained following incorporation of inverse probability of participation weights (Tables S2 and S3) and across specific diagnosis category (Table S4).

## Discussion

In the current study, the type and timing of trauma exposure did not predict hypertension during pregnancy. This result was in contrast to our hypothesis and prior literature, yet robust to sensitivity

analyses. This community sample experienced extremely high rates of trauma with the majority of surveyed individuals reporting exposure to direct experiences of violence and witnessing violence.<sup>24</sup> For example, compared to an analysis of the 2011-2014 Behavioral Risk Factor Surveillance System data, participants reported nearly twice the burden of intimate partner violence (31.7% compared to 18.2%) and nearly twice the rate of sexual abuse (26.7% compared to 16.3%).<sup>31</sup> Further, the burden of hypertension was nearly four times the national average of 15.9%(though similar to the burden experienced among the hospital as a whole).<sup>32</sup> These null results suggest nuance to the growing body of work showing an association between trauma and adverse pregnancy outcomes.<sup>16,33,34</sup>

There are several possible explanations for the observed null results. First, it may be that the “unexposed” group was an unusual and otherwise high risk group. Supporting that, the “no trauma” group had a higher rate of chronic and gestational diabetes than the trauma exposed group, in contrast to prior literature. Second, it is likely that this population continued to experience notable levels of stress and trauma during their pregnancy that our survey was unable to capture, as supported by prior research in this population.<sup>21</sup> This may have acted as a modifier of the association between lifetime trauma and hypertension during pregnancy. Third, it is possible that some threshold exists at which additional adversity does not confer additional cardiometabolic risk during pregnancy. Many of the prior studies of trauma and pregnancy outcomes were conducted in population-based samples with lower levels of ongoing social risks compared to this population.<sup>34,35</sup> Possibly, ongoing social risks outweighed historic trauma in this population. There are likely many possible pathways (or sufficient component causes) by which someone may develop hypertension during pregnancy.<sup>36</sup> It may be that individuals susceptible in this population have already completed the sufficient component causes regardless of trauma exposure through other physical and social risks. For example, risks from pollution exposure, low economic resources, poor metabolic health, family history of hypertension, and lack of primary care prior to pregnancy are common in this sample, any combination of which may have resulted in HDP. Fourth, primiparous and younger women were underrepresented in this sample. It may be that the impacts of life course trauma on



pregnancy outcomes is mediated by parity and age at first pregnancy.<sup>37,38</sup> We are unable to tease that out given that we only include a single delivery per participant and not a full reproductive history. This is not to state that trauma had no impact on the lives of participants. Notably, we observed a strong positive relationship between trauma burden and psychiatric symptoms, consistent with prior literature.<sup>39,40</sup>

The results of the current study should be interpreted in light of its limitations. First, the study population represents a selected sample with potential overrepresentation of individuals with prior mental health morbidity. However, inclusion of inverse probability of selection weights did not change associations meaningfully. Second, we were unable to fully control for childhood socioeconomic status (SES) and used a proxy and potential mediator, high school graduation. This may bias results towards the null. However, results were similar in adjusted and unadjusted models, suggesting that this was unlikely to be a major source of bias. Alternately, this proxy may have imperfectly captured SES, resulting in residual confounding. However, this study sample represents a relatively homogenous, low-SES sample, so we do not believe there would have been sufficient variation in childhood SES to substantially bias the results. Third, trauma was self-reported and recall of trauma is known to change over the life course, including during pregnancy.<sup>41</sup>

Exposure to traumatic events tends to cluster along the lines of socioeconomic position. Individuals who experience poverty, structural and interpersonal discrimination, and are of minoritized racial, national, or ethnic backgrounds are more likely to experience trauma across the life course.<sup>5-8,42</sup> The Weathering Hypothesis and other theoretical frameworks suggest that the disproportionate burden of stress and trauma among individuals with minoritized identities may drive racial disparities in perinatal outcomes.<sup>18</sup> Our current results demonstrate the challenge of understanding this relationship using data collected only at the time of pregnancy and within single hospitals. At the time of their pregnancies, participants in our study had experienced more reported trauma than most people will ever experience. Many reported experiencing trauma beginning at very early ages. Due to a highly segmented healthcare market for obstetric care, people with Medicaid and without insurance may have a smaller range of choice in

delivery hospitals, concentrating individuals with physical and social challenges in a single care site.<sup>43,44</sup>

To better understand how weathering occurs, we need longitudinal data. To prevent the toxic consequences of weathering on maternal and infant health, prevention of trauma and early interventions are critical. These results also highlight the need to incorporate socioeconomic diversity into studies of trauma and health outcomes. While trauma was not a predictor of hypertension in this pregnant population, the population experienced an extraordinarily high burden of trauma, hypertension, post-traumatic stress symptoms, and depressive symptoms. Universal perinatal screening and referral for mood disorders and PTSD and trauma-informed obstetric care may be beneficial for maternal and infant health.<sup>45-47</sup> Future research and clinical interventions focused on improving maternal care for communities experiencing high burdens of trauma are critical to improving maternal health outcomes.

Sources of Funding: This work was supported by the National Heart, Lung, and Blood Institute (K99HL161355), the National Institutes of Mental Health (R01MH115174) and the National Center for Complementary & Integrative Health (K23AT009713).

Disclosures: The authors have no conflicts of interest to disclose.

## References

1. Suglia SF, Koenen KC, Boynton-Jarrett R, et al. Childhood and Adolescent Adversity and Cardiometabolic Outcomes: A Scientific Statement From the American Heart Association. *Circulation*. 2018;137(5):e15-e28. doi:10.1161/CIR.0000000000000536
2. Dolsen MR, Crosswell AD, Prather AA. Links Between Stress, Sleep, and Inflammation: Are there Sex Differences? *Curr Psychiatry Rep*. 2019;21(2):8. doi:10.1007/s11920-019-0993-4
3. Danese A, McEwen BS. Adverse childhood experiences, allostasis, allostatic load, and age-related disease. *Physiology & Behavior*. 2012;106(1):29-39. doi:10.1016/j.physbeh.2011.08.019
4. Epel ES, Crosswell AD, Mayer SE, et al. More than a feeling: A unified view of stress measurement for population science. *Frontiers in neuroendocrinology*. 2018;49:146-169. doi:10.1016/j.yfrne.2018.03.001
5. Strompolis M, Tucker W, Crouch E, Radcliff E. The intersectionality of adverse childhood experiences, race/ethnicity, and income: Implications for policy. *J Prev Interv Community*. 2019;47(4):310-324. doi:10.1080/10852352.2019.1617387
6. Brown LL, Mitchell UA, Ailshire JA. Disentangling the Stress Process: Race/Ethnic Differences in the Exposure and Appraisal of Chronic Stressors Among Older Adults. *J Gerontol B Psychol Sci Soc Sci*. 2020;75(3):650-660. doi:10.1093/geronb/gby072
7. Slack KS, Font SA, Jones J. The Complex Interplay of Adverse Childhood Experiences, Race, and Income. *Health Soc Work*. 2017;42(1):e24-e31. doi:10.1093/hsw/hlw059
8. Williams DR, Lawrence JA, Davis BA. Racism and Health: Evidence and Needed Research. *Annual Review of Public Health*. 2019;40(1):105-125. doi:10.1146/annurev-publhealth-040218-043750
9. Koning SM, Ehrental DB. Stressor landscapes, birth weight, and prematurity at the intersection of race and income: Elucidating birth contexts through patterned life events. *SSM - Population Health*. 2019;8:100460. doi:10.1016/j.ssmph.2019.100460
10. Hauspurg A, Ying W, Hubel CA, Michos ED, Ouyang P. Adverse pregnancy outcomes and future maternal cardiovascular disease. *Clin Cardiol*. 2018;41(2):239-246. doi:10.1002/clc.22887
11. Lane-Cordova AD, Gunderson EP, Greenland P, et al. Life-Course Reproductive History and Cardiovascular Risk Profile in Late Mid-Life: The CARDIA Study. *J Am Heart Assoc*. 2020;9(10):e014859. doi:10.1161/JAHA.119.014859
12. Dassanayake M, Langen E, Davis MB. Pregnancy Complications as a Window to Future Cardiovascular Disease. *Cardiology in Review*. Published online April 12, 2019:1. doi:10.1097/CRD.0000000000000253
13. Rich-Edwards JW, Fraser A, Lawlor DA, Catov JM. Pregnancy characteristics and women's future cardiovascular health: an underused opportunity to improve women's health? *Epidemiologic reviews*. 2014;36(1):57-70. doi:10.1093/epirev/mxt006
14. Cohen BE, Edmondson D, Kronish IM. State of the Art Review: Depression, Stress, Anxiety, and Cardiovascular Disease. *Am J Hypertens*. 2015;28(11):1295-1302. doi:10.1093/ajh/hpv047

15. O'Donnell CJ, Schwartz Longacre L, Cohen BE, et al. Posttraumatic Stress Disorder and Cardiovascular Disease: State of the Science, Knowledge Gaps, and Research Opportunities. *JAMA Cardiology*. 2021;6(10):1207-1216. doi:10.1001/jamacardio.2021.2530
16. Jasthi DL, Lappen JR, Garber S, et al. Associations between adverse childhood experiences and obstetric outcomes in a predominantly Black-identifying and low-income pregnant population. *Am J Obstet Gynecol MF*. Published online May 6, 2023:101008. doi:10.1016/j.ajogmf.2023.101008
17. Stanhope KK, Cammack AL, Perreira KM, et al. Adverse childhood experiences and lifetime adverse maternal outcomes (gestational diabetes and hypertensive disorders of pregnancy) in the Hispanic Community Health Study/Study of Latinos. *Annals of Epidemiology*. 2020;50:1-6. doi:10.1016/j.annepidem.2020.08.004
18. Geronimus AT. The weathering hypothesis and the health of African-American women and infants: evidence and speculations. *Ethnicity & disease*. 1992;2(3):207-221.
19. Geronimus AT. Understanding and eliminating racial inequalities in women's health in the United States: The role of the weathering conceptual framework. *JAMWA*. 2001;56(4):133-137. doi:10.1080/19397030902947041
20. Friedman EM, Montez JK, Sheehan CM, Guenewald TL, Seeman TE. Childhood Adversities and Adult Cardiometabolic Health: Does the Quantity, Timing, and Type of Adversity Matter? *J Aging Health*. 2015;27(8):1311-1338. doi:10.1177/0898264315580122
21. Joseph NT, Stanhope KK, Geary F, et al. Social Determinants of Health Needs and Perinatal Risk in Socially Vulnerable Pregnant Patients. *Journal of Health Care for the Poor and Underserved*. 2023;34(2):685-702.
22. Boulet SL, Platner M, Joseph NT, et al. Hypertensive Disorders of Pregnancy, Cesarean Delivery, and Severe Maternal Morbidity in an Urban Safety-Net Population. *Am J Epidemiol*. 2020;189(12):1502-1511. doi:10.1093/aje/kwaa135
23. Wrenn GL, Wingo AP, Moore R, et al. The effect of resilience on posttraumatic stress disorder in trauma-exposed inner-city primary care patients. *J Natl Med Assoc*. 2011;103(7):560-566. doi:10.1016/s0027-9684(15)30381-3
24. Gluck RL, Hartzell GE, Dixon HD, et al. Trauma exposure and stress-related disorders in a large, urban, predominantly African-American, female sample. *Archives of women's mental health*. 2021;24(6):893-901.
25. Falsetti SA, Resnick HS, Resick PA, Kilpatrick DG. The modified PTSD symptom scale: a brief self-report measure of posttraumatic stress disorder. *The Behavior Therapist*. Published online 1993.
26. Blevins CA, Weathers FW, Davis MT, Witte TK, Domino JL. The Posttraumatic Stress Disorder Checklist for DSM-5 (PCL-5): Development and Initial Psychometric Evaluation. *J Trauma Stress*. 2015;28(6):489-498. doi:10.1002/jts.22059
27. Labgold K, Stanhope KK, Joseph NT, Platner M, Jamieson DJ, Boulet SL. Validation of Hypertensive Disorders During Pregnancy: ICD-10 Codes in a High-burden Southeastern United States Hospital. *Epidemiology*. 2021;32(4):591-597. doi:10.1097/EDE.0000000000001343

28. Geller SE, Ahmed S, Brown ML, Cox SM, Rosenberg D, Kilpatrick SJ. International classification of diseases–9th revision coding for preeclampsia: how accurate is it? *American Journal of Obstetrics and Gynecology*. 2004;190(6):1629-1633. doi:10.1016/j.ajog.2004.03.061
29. Aragon TJ, Fay MP, Wollschlaeger D, Omidpanah A, Omidpanah MA. Package ‘epitools.’ Published online 2017.
30. Howe CJ, Cole SR, Lau B, Napravnik S, Eron JJ. Selection Bias Due to Loss to Follow Up in Cohort Studies. *Epidemiology*. 2016;27(1):91-97. doi:10.1097/EDE.0000000000000409
31. Merrick MT, Ford DC, Ports KA, Guinn AS. Prevalence of Adverse Childhood Experiences From the 2011-2014 Behavioral Risk Factor Surveillance System in 23 States. *JAMA Pediatr*. 2018;172(11):1038-1044. doi:10.1001/jamapediatrics.2018.2537
32. Ford ND. Hypertensive Disorders in Pregnancy and Mortality at Delivery Hospitalization — United States, 2017–2019. *MMWR Morb Mortal Wkly Rep*. 2022;71. doi:10.15585/mmwr.mm7117a1
33. Schoenaker DAJM, Callaway LK, Mishra GD. The Role of Childhood Adversity in the Development of Gestational Diabetes. *American Journal of Preventive Medicine*. 2019;57(3):302-310. doi:10.1016/j.amepre.2019.04.028
34. Versteegen M, Bozlak CT, Larkin H, Appleton AA. Maternal depression, adverse childhood experiences, and social support in relation to gestational diabetes risk: results from the Albany Infant and Mother Study (AIMS). *BMC Pregnancy Childbirth*. 2021;21:335. doi:10.1186/s12884-021-03814-5
35. Miller ES, Fleming O, Ekpe EE, Grobman WA, Heard-Garris N. Association Between Adverse Childhood Experiences and Adverse Pregnancy Outcomes. *Obstet Gynecol*. 2021;138(5):770-776. doi:10.1097/AOG.0000000000004570
36. Rothman KJ, Greenland S. Causation and Causal Inference in Epidemiology. *Am J Public Health*. 2005;95(S1):S144-S150. doi:10.2105/AJPH.2004.059204
37. Cammack AL, Hogue CJ, Drews-Botsch CD, Kramer MR, Pearce BD. Associations Between Maternal Exposure to Child Abuse, Preterm Birth, and Very Preterm Birth in Young, Nulliparous Women. *Matern Child Health J*. 2019;23(6):847-857. doi:10.1007/s10995-018-02709-w
38. Davies M, van Houten CS, Bengtsson J, et al. Childhood adversity and the risk of gestational diabetes: A population-based cohort study of nulliparous pregnant women. *Diabetic Medicine*. Published online 2023:e15242.
39. Brunton R, Dryer R. Child Sexual Abuse and Pregnancy: A Systematic Review of the Literature. *Child Abuse & Neglect*. 2021;111:104802. doi:10.1016/j.chiabu.2020.104802
40. Seng JS, Low LK, Sperlich M, Ronis DL, Liberzon I. Prevalence, trauma history, and risk for posttraumatic stress disorder among nulliparous women in maternity care. *Obstet Gynecol*. 2009;114(4):839-847. doi:10.1097/AOG.0b013e3181b8f8a2
41. Cammack AL, Hogue CJ, Drews-Botsch CD, et al. Test-retest reliability of retrospective self-reported maternal exposure to childhood abuse and neglect. *Archives of women’s mental health*. 2016;19(2):415-421. doi:10.1007/s00737-015-0536-x

42. Lu MC, Chen B. Racial and ethnic disparities in preterm birth: the role of stressful life events. *Am J Obstet Gynecol*. 2004;191(3):691-699. doi:10.1016/j.ajog.2004.04.018
43. Vinekar K. Pathology of Racism — A Call to Desegregate Teaching Hospitals. *New England Journal of Medicine*. 2021;385(13):e40. doi:10.1056/NEJMp2113508
44. Andaya E. Stratification through medicaid. *Unequal coverage: The experience of health care reform in the United States*. Published online 2017:103-126.
45. Padin AC, Stevens NR, Che ML, Erondu IN, Perera MJ, Shalowitz MU. Screening for PTSD during pregnancy: a missed opportunity. *BMC Pregnancy Childbirth*. 2022;22(1):487. doi:10.1186/s12884-022-04797-7
46. Owens L, Terrell S, Low LK, et al. Universal precautions: the case for consistently trauma-informed reproductive healthcare. *American Journal of Obstetrics & Gynecology*. 2022;226(5):671-677. doi:10.1016/j.ajog.2021.08.012
47. Sperlich M, Seng JS, Li Y, Taylor J, Bradbury-Jones C. Integrating Trauma-Informed Care Into Maternity Care Practice: Conceptual and Practical Issues. *Journal of Midwifery & Women's Health*. 2017;62(6):661-672. doi:https://doi.org/10.1111/jmwh.12674

**Table 1.** Participant characteristics, stratified by lifetime trauma exposure, Grady Trauma Project, n = 704 individuals with a delivery between 2011-2023

|                                                | <b>One or more<br/>traumatic events<br/>(N=661)</b> | <b>No trauma reported<br/>(N=43)</b> | <b>Overall<br/>(N=704)</b> |
|------------------------------------------------|-----------------------------------------------------|--------------------------------------|----------------------------|
| <b>Educational attainment</b>                  |                                                     |                                      |                            |
| Less than high school                          | 147 (22.2%)                                         | 5 (11.6%)                            | 152 (21.6%)                |
| High school graduate                           | 513 (77.6%)                                         | 38 (88.4%)                           | 551 (78.3%)                |
| Missing                                        | 1 (0.2%)                                            | 0 (0%)                               | 1 (0.1%)                   |
| <b>Age at delivery</b>                         |                                                     |                                      |                            |
| Mean (SD)                                      | 26.8 (5.76)                                         | 24.4 (5.31)                          | 26.7 (5.76)                |
| Median [Min, Max]                              | 26.0 [16.0, 45.0]                                   | 22.0 [18.0, 40.0]                    | 26.0 [16.0, 45.0]          |
| <b>Monthly Income</b>                          |                                                     |                                      |                            |
| \$0-249                                        | 84 (12.7%)                                          | 3 (7.0%)                             | 87 (12.4%)                 |
| \$250-499                                      | 67 (10.1%)                                          | 9 (20.9%)                            | 76 (10.8%)                 |
| \$500-999                                      | 116 (17.5%)                                         | 7 (16.3%)                            | 123 (17.5%)                |
| \$1000-1999                                    | 200 (30.3%)                                         | 6 (14.0%)                            | 206 (29.3%)                |
| \$2000+                                        | 130 (19.7%)                                         | 9 (20.9%)                            | 139 (19.7%)                |
| Missing                                        | 64 (9.7%)                                           | 9 (20.9%)                            | 73 (10.4%)                 |
| <b>Reports romantic partner</b>                |                                                     |                                      |                            |
| No                                             | 553 (83.7%)                                         | 32 (74.4%)                           | 585 (83.1%)                |
| Yes                                            | 108 (16.3%)                                         | 11 (25.6%)                           | 119 (16.9%)                |
| <b>Race/Ethnicity</b>                          |                                                     |                                      |                            |
| Non-Hispanic Black                             | 642 (97.1%)                                         | 42 (97.7%)                           | 684 (97.2%)                |
| Other                                          | 15 (2.3%)                                           | 1 (2.3%)                             | 16 (2.3%)                  |
| Missing                                        | 4 (0.6%)                                            | 0 (0%)                               | 4 (0.6%)                   |
| <b>Insurance during pregnancy</b>              |                                                     |                                      |                            |
| Medicaid                                       | 621 (93.9%)                                         | 42 (97.7%)                           | 663 (94.2%)                |
| Commercial insurance or uninsured              | 40 (6.1%)                                           | 1 (2.3%)                             | 41 (5.8%)                  |
| <b>Hypertension diagnosis at delivery</b>      |                                                     |                                      |                            |
| Chronic hypertension                           | 71 (10.7%)                                          | 5 (11.6%)                            | 76 (10.8%)                 |
| Superimposed Preeclampsia                      | 39 (5.9%)                                           | 3 (7.0%)                             | 42 (6.0%)                  |
| Gestational hypertension                       | 117 (17.7%)                                         | 10 (23.3%)                           | 127 (18.0%)                |
| Preeclampsia without severe features           | 15 (2.3%)                                           | 0 (0%)                               | 15 (2.1%)                  |
| Preeclampsia with severe features or eclampsia | 27 (4.1%)                                           | 0 (0%)                               | 27 (3.8%)                  |
| Normotensive                                   | 392 (59.3%)                                         | 25 (58.1%)                           | 417 (59.2%)                |
| <b>Diabetes</b>                                |                                                     |                                      |                            |
| No diabetes                                    | 603 (91.2%)                                         | 37 (86.0%)                           | 640 (90.9%)                |
| Chronic diabetes                               | 30 (4.5%)                                           | 3 (7.0%)                             | 33 (4.7%)                  |
| Gestational diabetes                           | 28 (4.2%)                                           | 3 (7.0%)                             | 31 (4.4%)                  |
| <b>Preterm birth, &lt;37 weeks</b>             |                                                     |                                      |                            |
| No                                             | 551 (83.4%)                                         | 36 (83.7%)                           | 587 (83.4%)                |

|                                                  |                   |                   |                   |
|--------------------------------------------------|-------------------|-------------------|-------------------|
| Yes                                              | 106 (16.0%)       | 7 (16.3%)         | 113 (16.1%)       |
| Missing                                          | 4 (0.6%)          | 0 (0%)            | 4 (0.6%)          |
| <b>Probable PTSD diagnosis</b>                   |                   |                   |                   |
| No                                               | 400 (60.5%)       | 25 (58.1%)        | 425 (60.4%)       |
| Yes                                              | 208 (31.5%)       | 0 (0%)            | 208 (29.5%)       |
| Missing                                          | 53 (8.0%)         | 18 (41.9%)        | 71 (10.1%)        |
| <b>Probable depression diagnosis</b>             |                   |                   |                   |
| No                                               | 409 (61.9%)       | 41 (95.3%)        | 450 (63.9%)       |
| Yes                                              | 204 (30.9%)       | 1 (2.3%)          | 205 (29.1%)       |
| Missing                                          | 48 (7.3%)         | 1 (2.3%)          | 49 (7.0%)         |
| <b>Gestational Age at Entry to Prenatal Care</b> |                   |                   |                   |
| Mean (SD)                                        | 15.3 (7.49)       | 13.5 (7.25)       | 15.1 (7.48)       |
| Median [Min, Max]                                | 13.0 [4.00, 38.0] | 11.0 [5.00, 31.0] | 13.0 [4.00, 38.0] |
| Missing                                          | 8 (1.2%)          | 0 (0%)            | 8 (1.1%)          |
| <b>Parity</b>                                    |                   |                   |                   |
| 0 prior births                                   | 124 (18.8%)       | 14 (32.6%)        | 138 (19.6%)       |
| 1 prior birth                                    | 153 (23.1%)       | 10 (23.3%)        | 163 (23.2%)       |
| 2+ prior births                                  | 381 (57.6%)       | 19 (44.2%)        | 400 (56.8%)       |
| Missing                                          | 3 (0.5%)          | 0 (0%)            | 3 (0.4%)          |
| <b>Childhood Trauma Questionnaire Score</b>      |                   |                   |                   |
| Mean (SD)                                        | 42.0 (18.6)       | 28.2 (5.58)       | 41.2 (18.4)       |
| Median [Min, Max]                                | 35.0 [25.0, 119]  | 26.0 [25.0, 49.0] | 34.0 [25.0, 119]  |
| Missing                                          | 25 (3.8%)         | 2 (4.7%)          | 27 (3.8%)         |
| <b>Number of prenatal care visits</b>            |                   |                   |                   |
| Mean (SD)                                        | 8.07 (3.75)       | 8.23 (3.65)       | 8.08 (3.74)       |
| Median [Min, Max]                                | 8.00 [0, 32.0]    | 9.00 [2.00, 17.0] | 8.00 [0, 32.0]    |



**Table 2.** Reported traumatic events experienced or witnessed and mean years since, Grady Trauma Project, individuals with a Grady delivery, 2011-2023, n = 704

| <b>Trauma Type</b>                                                                                       | <b>% (N)</b> | <b>Time since (years), Mean (SD)</b> | <b>Age at first experience Mean (SD)</b> |
|----------------------------------------------------------------------------------------------------------|--------------|--------------------------------------|------------------------------------------|
| Not interpersonal                                                                                        | 62.5 (440)   | 8.6 (6.6)                            | 14.3 (7.8)                               |
| Natural disaster (such as a tornado, hurricane, or flood)                                                | 18.2 (128)   | 15.1 (8.5)                           | 12.7 (7.2)                               |
| Serious accident or injury                                                                               | 40.2 (283)   | 12.3 (8.3)                           | 14.8 (7.2)                               |
| Sudden life-threatening illness                                                                          | 13.2 (93)    | 9.2 (8.1)                            | 19.5 (9.5)                               |
| Other                                                                                                    | 23 (162)     | 7.9 (7.3)                            | 19.3 (8.3)                               |
| Experienced violence                                                                                     | 56.5 (398)   | 8.7 (6.6)                            | 13.2 (6.7)                               |
| Military combat or service in a war zone                                                                 | 0.6 (4)      | 10.8 (3.6)                           | 22.8 (2.8)                               |
| Attacked with a gun, knife, or other weapon by a spouse, romantic partner/boyfriend or girlfriend        | 13.9 (98)    | 7.9 (5.8)                            | 20 (3.9)                                 |
| Attacked with a gun, knife, or other weapon by someone else                                              | 19.3 (136)   | 8.8 (6.5)                            | 15.7 (6.4)                               |
| Attacked without a weapon by a spouse, romantic partner/boyfriend or girlfriend                          | 31.7 (223)   | 8.1 (5.7)                            | 20.9 (4.3)                               |
| Attacked without a weapon by someone else                                                                | 24.4 (172)   | 11 (6.8)                             | 18.9 (6.1)                               |
| Physical Maltreatment, childhood                                                                         | 18 (127)     | 19.4 (7.5)                           | 8.1 (3.6)                                |
| Emotional maltreatment, childhood                                                                        | 27.6 (194)   | 17.2 (7.9)                           | 9.7 (4.2)                                |
| Witnessed violence                                                                                       | 74.6 (525)   | 16.2 (10.1)                          | 11.6 (6.2)                               |
| Witnessed a family member or friend being attacked with a gun, knife, or other weapon                    | 26 (183)     | 11.9 (8)                             | 15.4 (6.4)                               |
| Witnessed someone other than a family member or friend being attacked with a gun, knife, or other weapon | 21.9 (154)   | 11.3 (7.2)                           | 15.7 (5.6)                               |
| Witnessed a family member or friend being attacked without a weapon                                      | 32.8 (231)   | 12.9 (8)                             | 14.3 (6.2)                               |
| Witnessed someone other than a family member or friend being attacked without a weapon                   | 31.1 (219)   | 12.3 (7.7)                           | 15.4 (6.7)                               |
| Close friend or family who was murdered                                                                  | 33.5 (236)   | 10.8 (7.7)                           | 16.1 (7)                                 |
| Witness violence between your parents or caregivers when you were a child                                | 28.7 (202)   | 20.1 (7.2)                           | 7.7 (3.7)                                |
| Experienced sexual assault or abuse                                                                      | 36.5 (257)   | 14.4 (7.5)                           | 10.6 (5.3)                               |
| Sexual abuse, before age 13                                                                              | 26.7 (188)   | 20.1 (6.8)                           | 8.2 (3.2)                                |
| Sexual abuse, ages 13-17                                                                                 | 14.8 (104)   | 13.4 (6.5)                           | 14.6 (2)                                 |

|                          |          |           |            |
|--------------------------|----------|-----------|------------|
| Sexual assault, ages 17+ | 9.9 (70) | 9.3 (5.7) | 20.9 (4.4) |
|--------------------------|----------|-----------|------------|

---

**Table 3.** Estimated associations between trauma events ever and by timing of exposure and hypertensive disorders of pregnancy, \* Grady Trauma Project, individuals with a Grady delivery, 2011-2023, n = 700

|                            | HDP, unadjusted<br>Risk Ratio<br>(95% CI) | HDP, adjusted †<br>Risk Ratio<br>(95% CI) |
|----------------------------|-------------------------------------------|-------------------------------------------|
| <b>Any trauma</b>          |                                           |                                           |
| Any trauma, 0-9            | 1.05 (95% CI:0.86-1.23)                   | 1.01 (95% CI:0.83-1.19)                   |
| Any trauma, 10-19          | 0.79 (95% CI:0.63-0.96)                   | 0.8 (95% CI:0.64-0.96)                    |
| Any trauma, 20+            | 1.2 (95% CI:0.96-1.44)                    | 1.15 (95% CI:0.91-1.38)                   |
| <b>Non-interpersonal</b>   | 1.14 (95% CI:0.91-1.38)                   | 1.12 (95% CI:0.89-1.34)                   |
| 0-9                        | 1.18 (95% CI:0.94-1.42)                   | 1.17 (95% CI:0.9-1.44)                    |
| 10-19                      | 0.87 (95% CI:0.71-1.03)                   | 0.87 (95% CI:0.71-1.03)                   |
| 20+                        | 1.08 (95% CI:0.87-1.3)                    | 1.04 (95% CI:0.83-1.24)                   |
| <b>Violence</b>            | 1.04 (95% CI:0.83-1.24)                   | 1.04 (95% CI:0.84-1.23)                   |
| 0-9                        | 0.92 (95% CI:0.71-1.14)                   | 0.87 (95% CI:0.67-1.07)                   |
| 10-19                      | 1.05 (95% CI:0.86-1.24)                   | 1.05 (95% CI:0.86-1.24)                   |
| 20+                        | 1.05 (95% CI:0.83-1.26)                   | 0.99 (95% CI:0.79-1.19)                   |
| <b>Witnessing Violence</b> | 0.99 (95% CI:0.79-1.19)                   | 0.98 (95% CI:0.77-1.2)                    |
| 0-9                        | 0.96 (95% CI:0.78-1.15)                   | 0.97 (95% CI:0.78-1.15)                   |
| 10-19                      | 0.89 (95% CI:0.73-1.04)                   | 0.9 (95% CI:0.74-1.06)                    |
| 20+                        | 1.03 (95% CI:0.82-1.25)                   | 1 (95% CI:0.79-1.21)                      |
| <b>Sexual trauma</b>       | 1 (95% CI:0.79-1.21)                      | 0.97 (95% CI:0.78-1.15)                   |
| 0-9                        | 0.99 (95% CI:0.75-1.24)                   | 0.94 (95% CI:0.72-1.17)                   |
| 10-19                      | 1.01 (95% CI:0.79-1.22)                   | 1.03 (95% CI:0.82-1.24)                   |
| 20+                        | 1.21 (95% CI:0.75-1.66)                   | 1.02 (95% CI:0.62-1.42)                   |

\*Hypertension inclusive of chronic hypertension, gestational hypertension, preeclampsia, or eclampsia

†Adjusted for parity (primiparous or multiparous), education (binary), age at delivery (< 20 years, 20-34, 35+)

**Table 4.** Estimated associations between recency of exposure to trauma and hypertensive disorders of pregnancy,\* Grady Trauma Project, individuals with a Grady delivery, 2011-2023, n = 700

|                                      | HDP, unadjusted<br>Risk Ratio<br>(95% CI) | HDP, adjusted<br>Risk Ratio <sup>†</sup><br>(95% CI) |
|--------------------------------------|-------------------------------------------|------------------------------------------------------|
| <b>Non-interpersonal (n = 440)</b>   |                                           |                                                      |
| < 3 years prior to delivery          | ref                                       | ref                                                  |
| 3-10 years prior to delivery         | 1.07 (95% CI:0.78-1.37)                   | 1.09 (95% CI:0.79-1.39 <sup>‡</sup> )                |
| 10 + years prior to delivery         | 1.27 (95% CI:0.94-1.61)                   | 1.23 (95% CI:0.91-1.55)                              |
| <b>Violence (n = 398)</b>            |                                           |                                                      |
| < 3 years prior to delivery          | ref                                       | ref                                                  |
| 3-10 years prior to delivery         | 1.09 (95% CI:0.75-1.44)                   | 1.08 (95% CI:0.74-1.42)                              |
| 10 + years prior to delivery         | 1.43 (95% CI:1-1.86)                      | 1.36 (95% CI:0.93-1.79)                              |
| <b>Witnessing Violence (n = 525)</b> |                                           |                                                      |
| < 3 years prior to delivery          | ref                                       | ref                                                  |
| 3-10 years prior to delivery         | 0.81 (95% CI:0.56-1.06)                   | 0.82 (95% CI:0.56-1.07)                              |
| 10 + years prior to delivery         | 1.2 (95% CI:0.89-1.51)                    | 1.15 (95% CI:0.83-1.46)                              |
| <b>Sexual trauma (n = 257)</b>       |                                           |                                                      |
| < 3 years prior to delivery          | ref                                       | ref                                                  |
| 3-10 years prior to delivery         | 0.64 (95% CI:0.24-1.05)                   | 0.67 (95% CI:0.26-1.08)                              |
| 10 + years prior to delivery         | 0.94 (95% CI:0.44-1.44)                   | 0.9 (95% CI:0.43-1.38)                               |

\*Hypertension inclusive of chronic hypertension, gestational hypertension, preeclampsia, or eclampsia

<sup>†</sup>Adjusted for parity (primiparous or multiparous), education (binary), age at delivery (< 20 years, 20-34, 35+)

<sup>‡</sup> Adjusted for age and education only

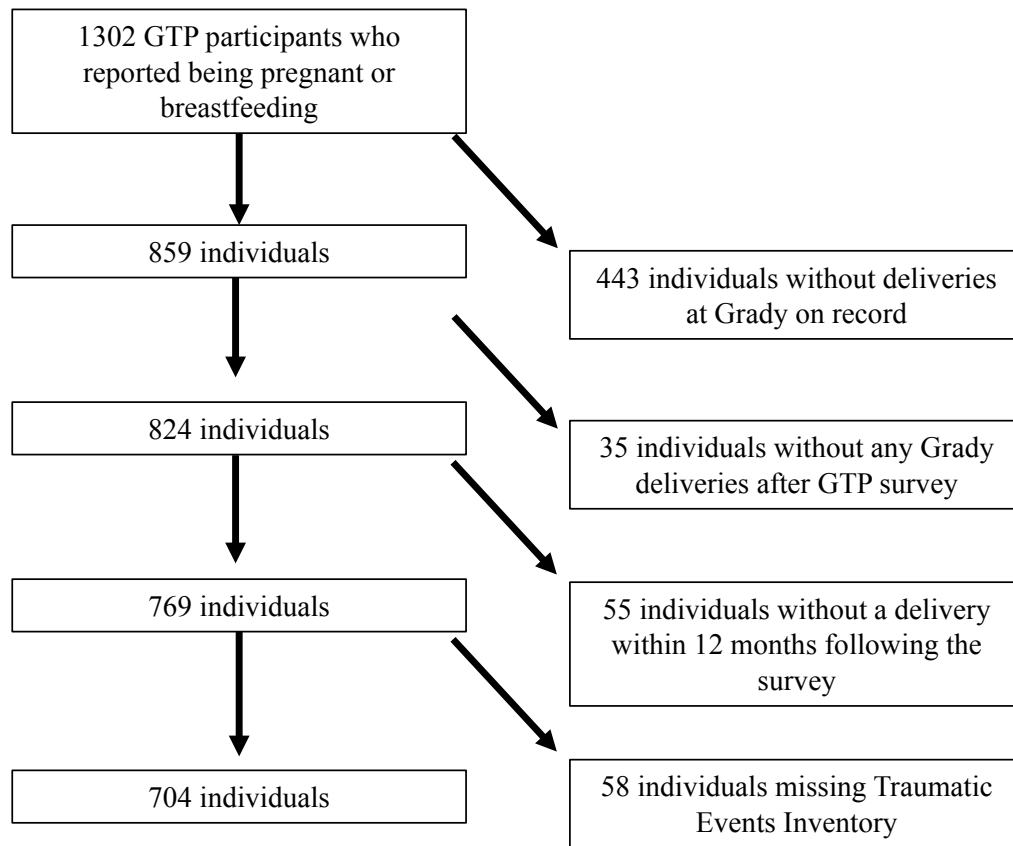

**Figure 1.** Study flow diagram showing exclusion at different stages, 704 included individuals with a delivery at Grady Memorial Hospital, 2011-2023, who participated in the Grady Trauma Project
